# Supplementary material for: Highly active and stable Co (Co3O4)_Sm2O3nano-crystallites derived from Sm2Co7and SmCo5intermetallic compounds in NH3synthesis and CO2conversion
Source: Royal Society of Chemistry journal article supplement (doi:10.1039/d1cy01956b), 2021-12-15
Supplement: d1cy01956b1.pdf [file d1cy01956b1.pdf]

## **Supporting Information**

### **Highly Active and Stable Co(Co<sub>3</sub>O<sub>4</sub>)/Sm<sub>2</sub>O<sub>3</sub> Nano crystallites Derived from Sm<sub>2</sub>Co<sub>7</sub> and SmCo<sub>5</sub> Intermetallic Compound in NH<sub>3</sub> Synthesis and CO<sub>2</sub> Conversion**

**Vijaykumar S Marakatti,<sup>a\*</sup> Maria Ronda-Lloret,<sup>b</sup> M. Krajčí,<sup>c</sup> Boby Joseph,<sup>d</sup> Carlo Marini,<sup>e</sup> Juan Jose Delgado,<sup>f</sup> François Devred,<sup>a</sup> N. Raveendran Shiju,<sup>b</sup> Eric M Gaigneaux<sup>a\*</sup>**

*<sup>a</sup>Institute of Condensed Matter and Nanosciences (IMCN), Molecular chemistry, Solids and Catalysis (MOST), Université catholique de Louvain (UCLouvain), Place Louis Pasteur, B-1348 Louvain-la-Neuve, Belgium.*

*<sup>b</sup>Van't Hoff Institute for Molecular Sciences, University of Amsterdam, Science Park 904, Amsterdam 1090 GD, The Netherlands.*

*<sup>c</sup>Institute of Physics, Slovak Academy of Sciences, Bratislava SK-84511, Slovakia*

*<sup>d</sup>Elettra-Sincrotrone Trieste S. C. p. A., S.S. 14, Km 163.5 in Area Science Park, Basovizza 34149, Italy*

*<sup>e</sup>ALBA Synchrotron Light Source, Carrer de la Llum 2-26, Cerdanyola del Vallès, Barcelona, Spain*

*<sup>f</sup>Departamento de Ciencia de los Materiales e Ingeniería Metalúrgica y Química Inorgánica, e IMEYMAT, Instituto Universitario de Investigación en Microscopía Electrónica y Materiales, Universidad de Cádiz, Puerto Real 11510, Spain*

*\*Corresponding author: [eric.gaigneaux@uclouvain.be](mailto:eric.gaigneaux@uclouvain.be), [chmvijay@gmail.com](mailto:chmvijay@gmail.com)*

*Phone: +32 (0)10 47 36 65 - Fax: +32 (0)10 47 36 49*

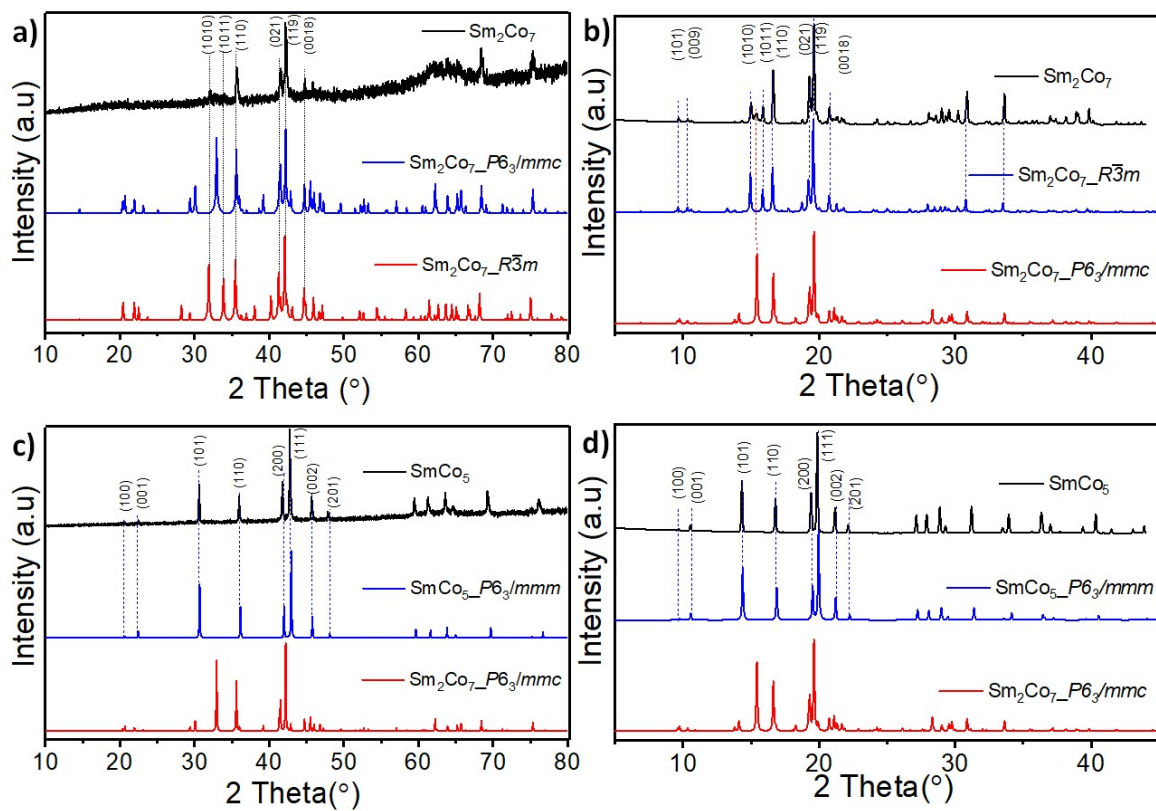

**Figure S1.** Comparison of low and high energy XRD patterns of  $\text{Sm}_2\text{Co}_7$  (a&b) and  $\text{SmCo}_5$  (c&d) intermetallic compounds with simulated patterns

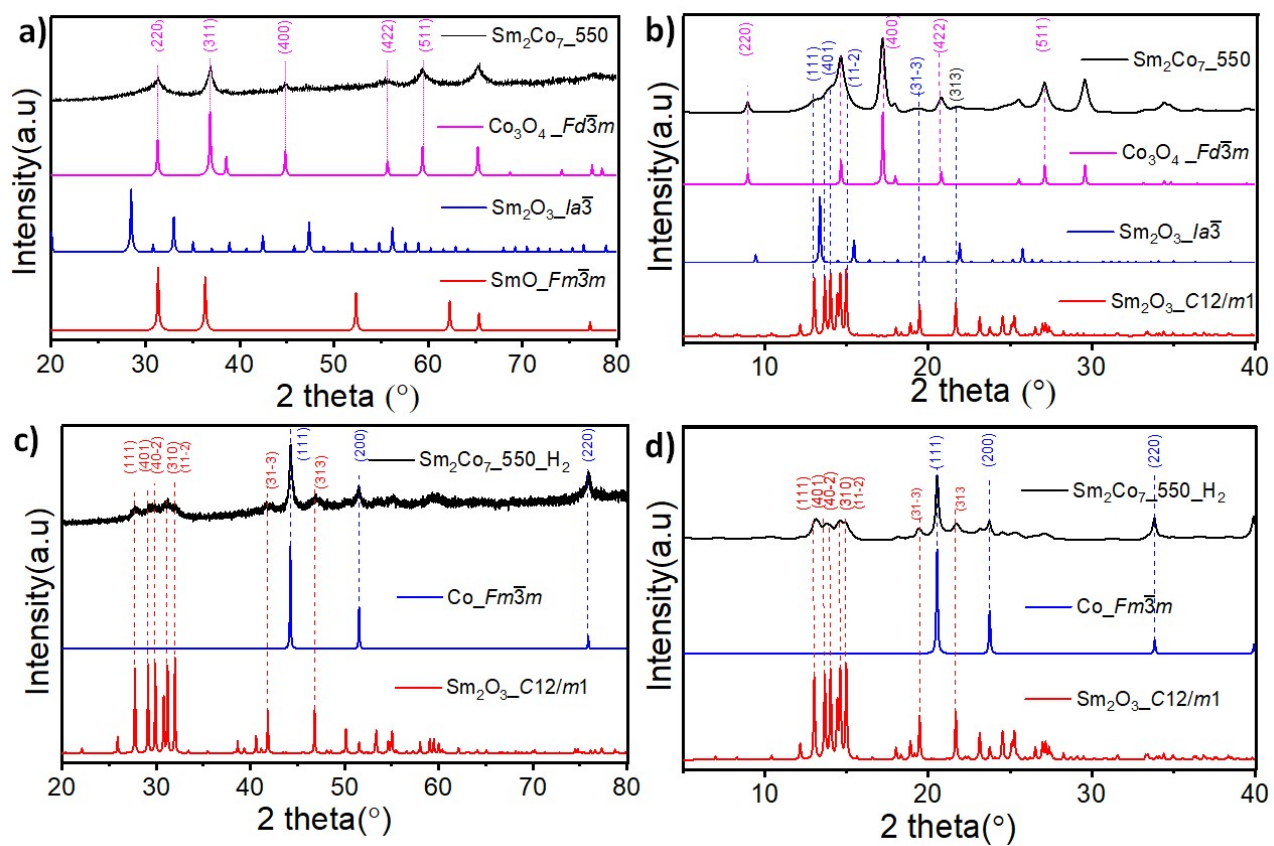

**Figure S2.** . Comparison of low and high energy XRD patterns of  $\text{Sm}_2\text{Co}_7_{550}$  (a&b) and  $\text{Sm}_2\text{Co}_7_{550}\text{H}_2$  (c&d).

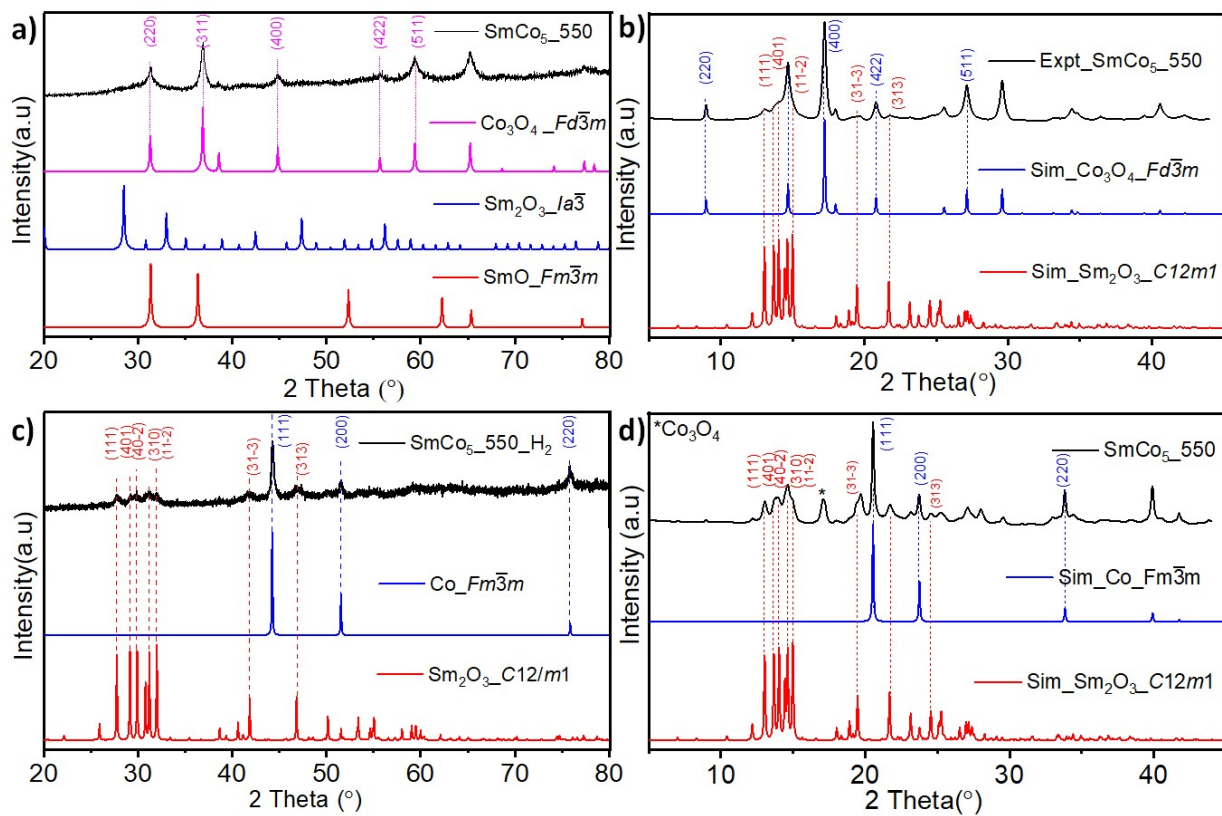

**Figure S3.** Comparison of low and high energy XRD patterns of  $\text{SmCo}_5_{550}$  (a&b) and  $\text{SmCo}_5_{550\_H_2}$  (c&d).

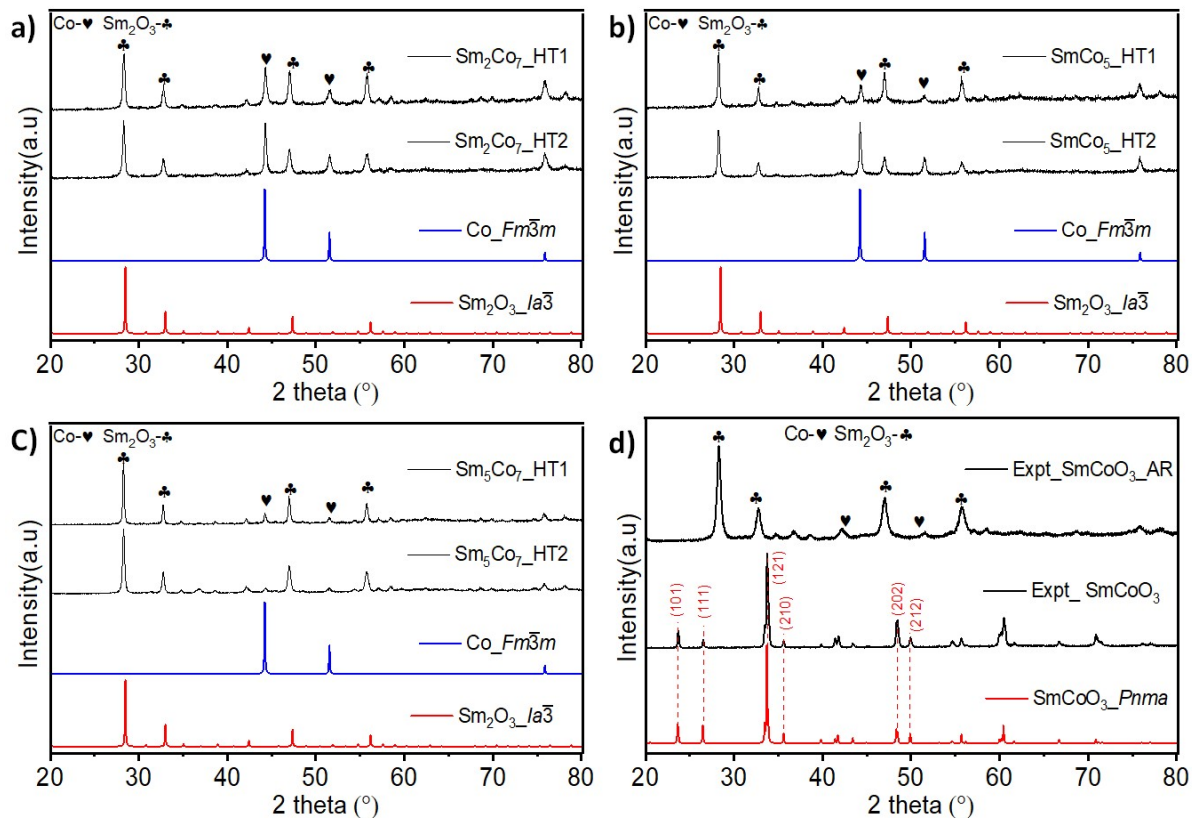

**Figure S4.** XRD pattern a)  $\text{Sm}_2\text{Co}_7$  b)  $\text{SmCo}_5$  c)  $\text{Sm}_5\text{Co}_7$  compounds synthesized by HT1 and HT2 hydrothermal methods. d) Comparison of XRD patterns of  $\text{SmCoO}_3$  with simulated one before reaction and after reaction (AR).

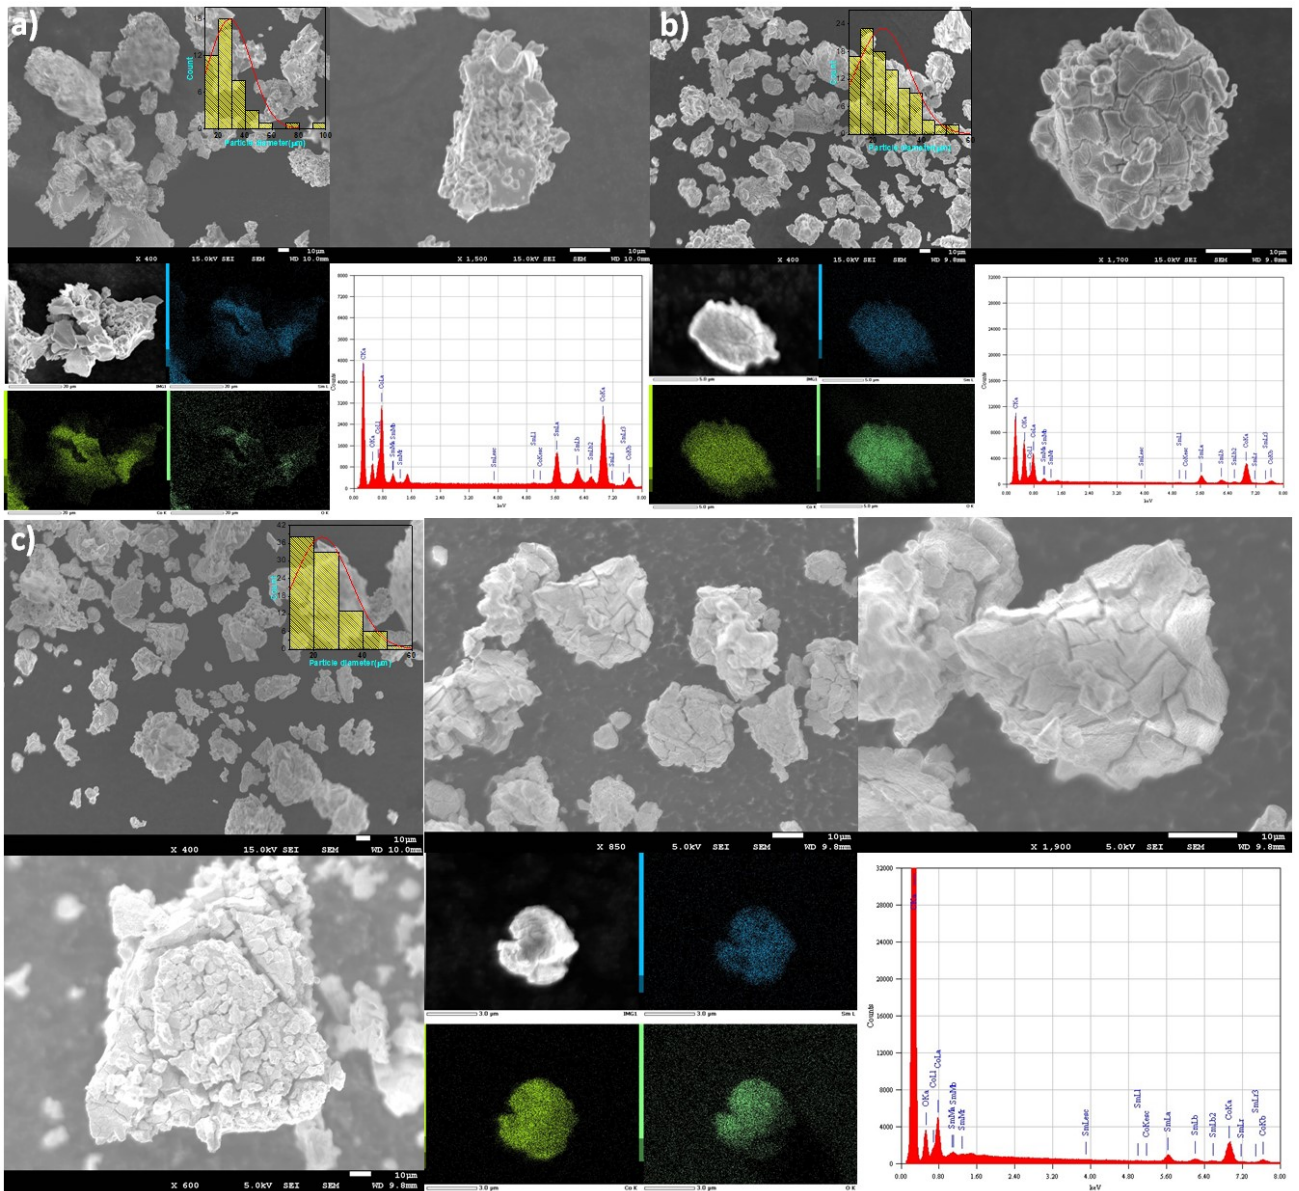

**Figure S5.** SEM images, particle size distribution, color mapping (Blue-Sm, Yellow, Co, Green -O) and EDAX spectra of a)  $\text{SmCo}_5$  b)  $\text{SmCo}_5_{550}$ , and c)  $\text{SmCo}_5_{550}\text{H}_2$ .

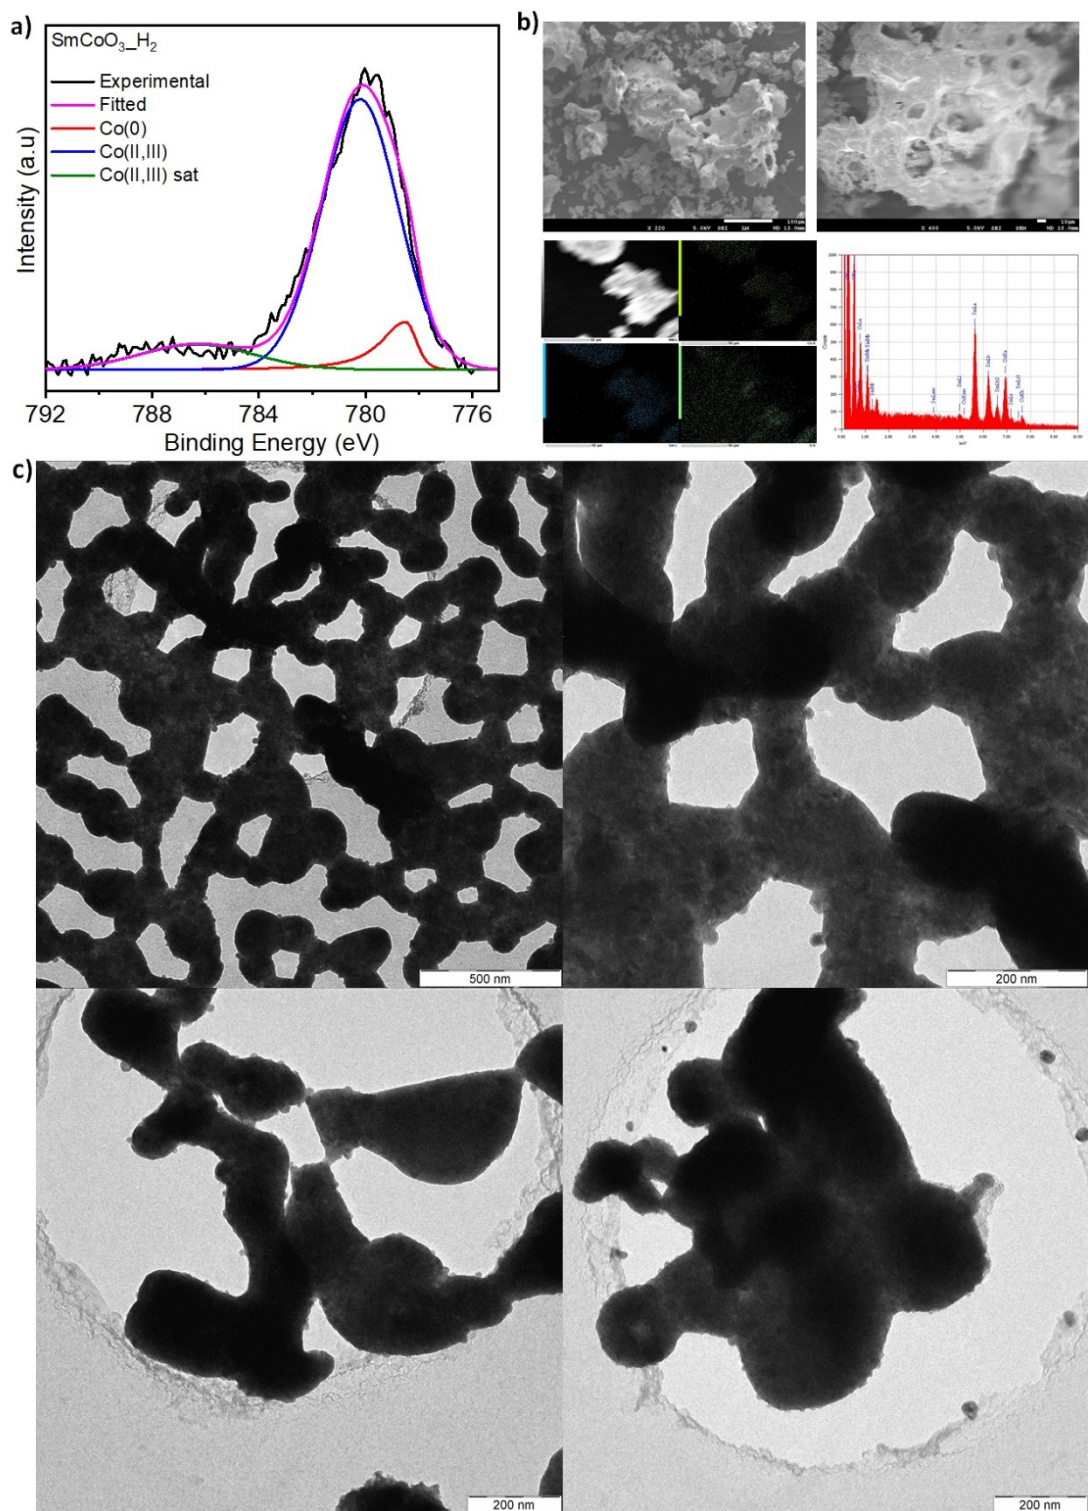

**Figure S6.** a)  $\text{Co } 2p_{3/2}$  XPS spectra, b) SEM and c) TEM images of  $\text{SmCoO}_3\text{-H}_2$

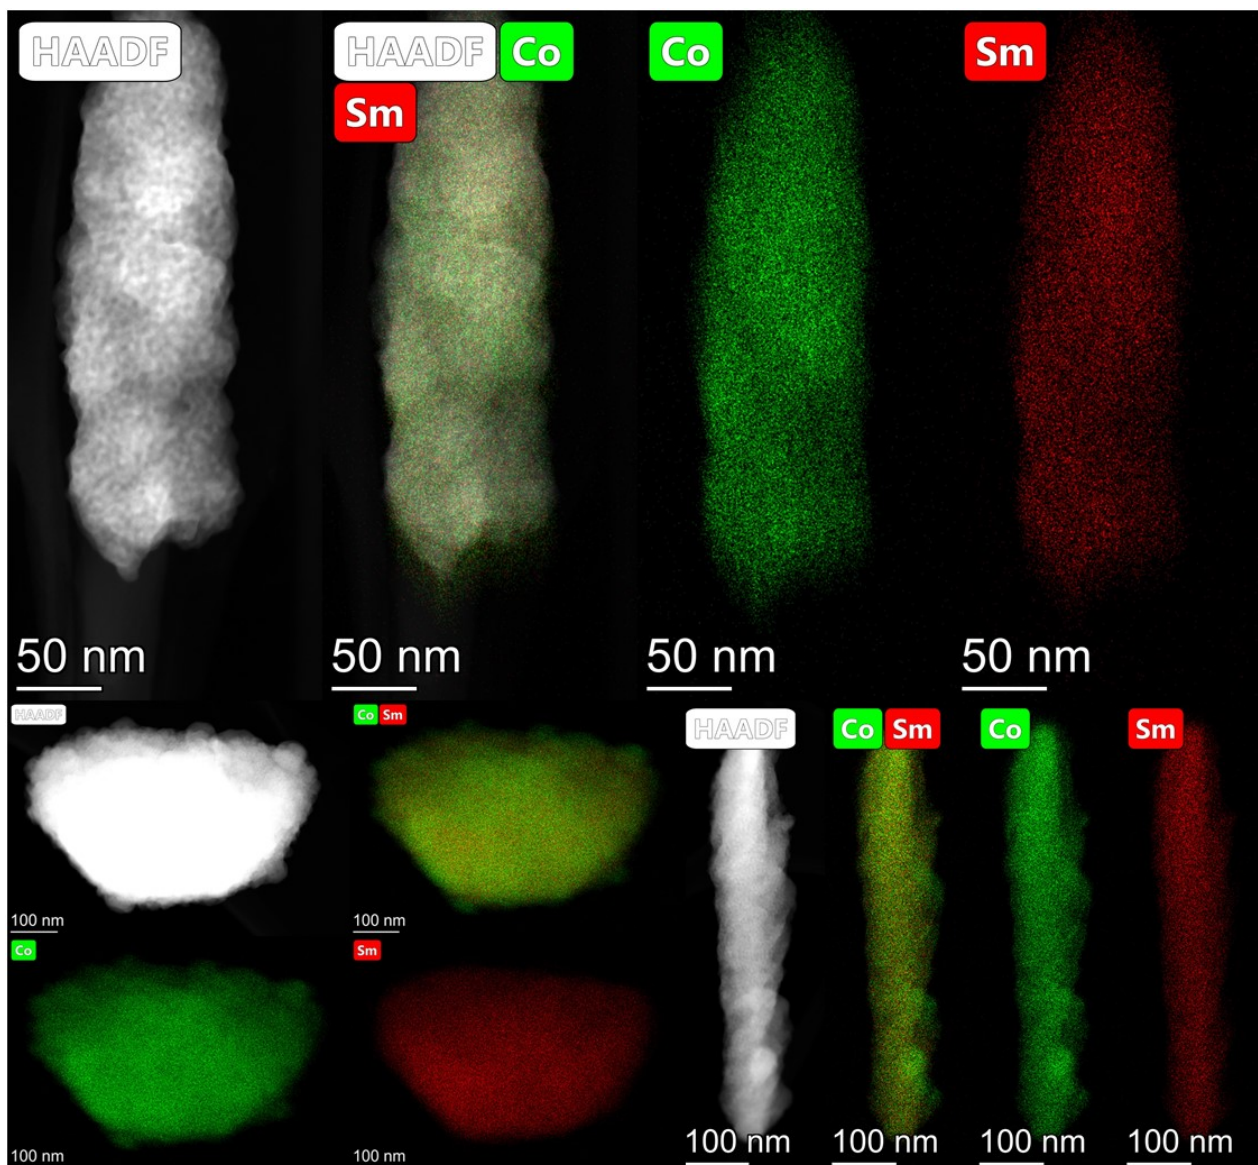

**Figure S7.** HAADF-STEM images and elemental color mapping of  $\text{Sm}_2\text{Co}_7$ \_550



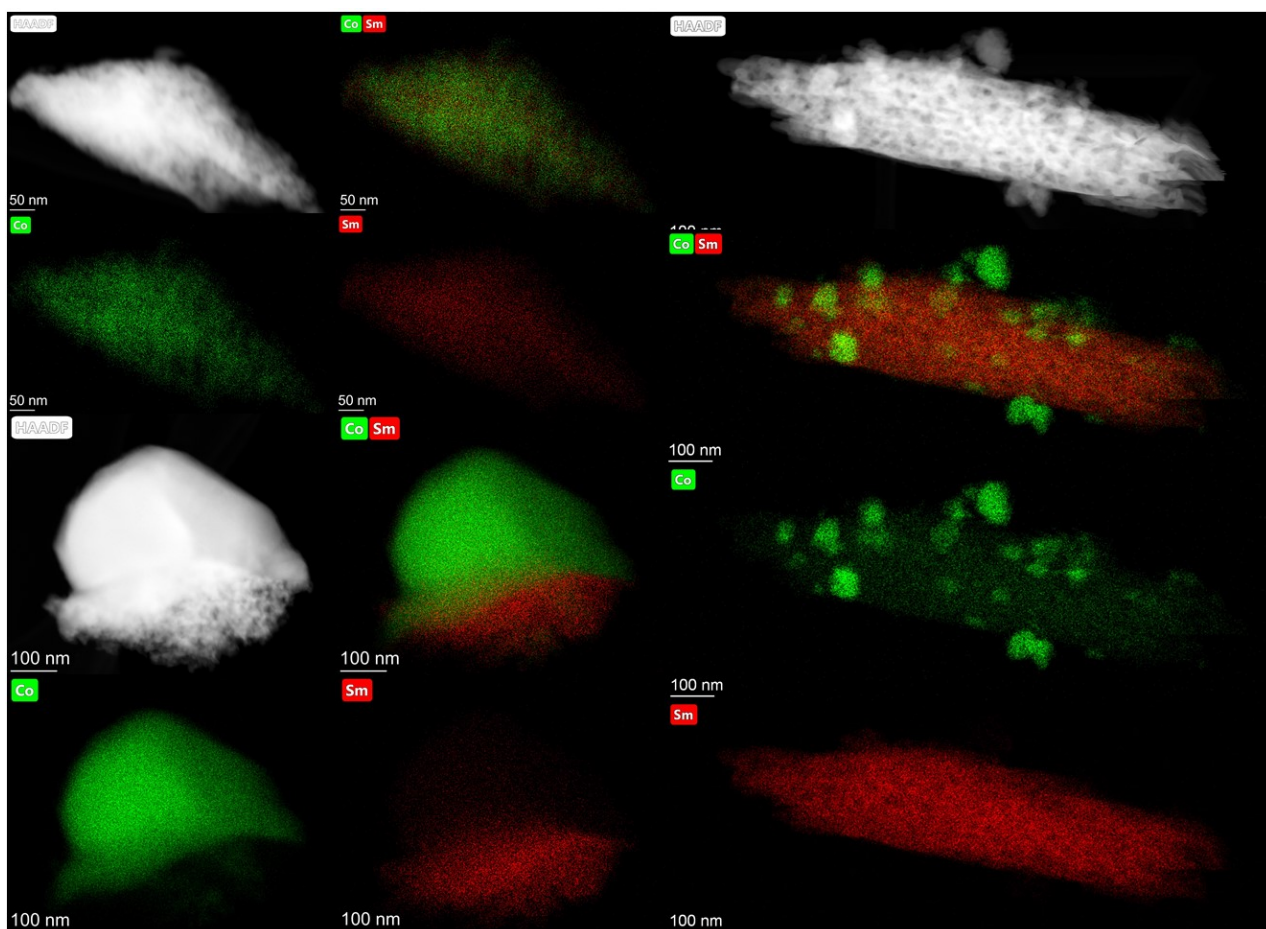

**Figure S8.** HAADF-STEM images and elemental color mapping of  $\text{Sm}_2\text{Co}_7_{550}\text{H}_2$

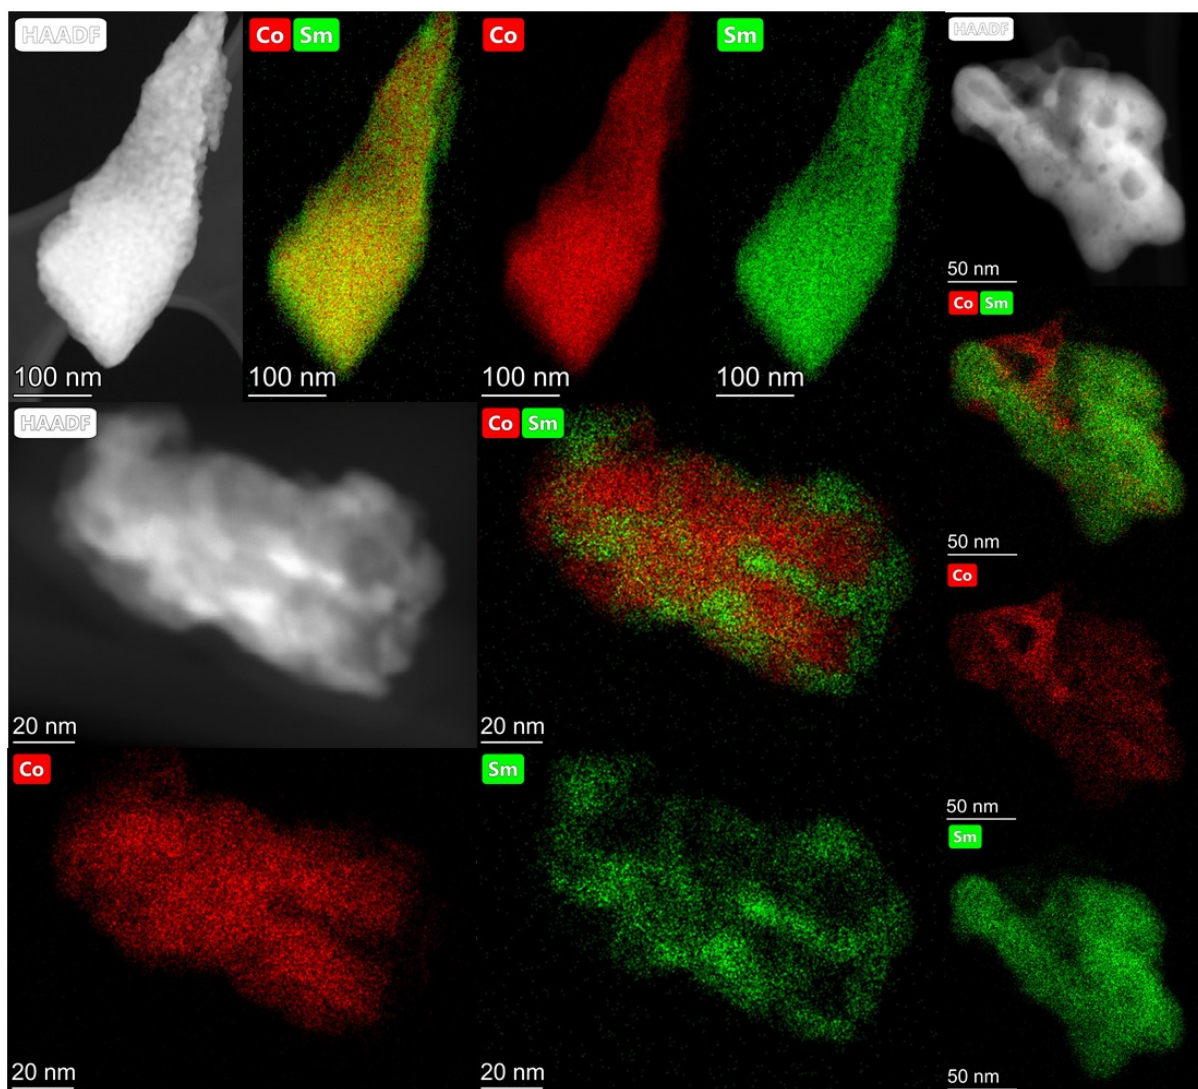

**Figure S9.** HAADF-STEM images and elemental color mapping of SmCo<sub>5</sub>\_550\_H<sub>2</sub>

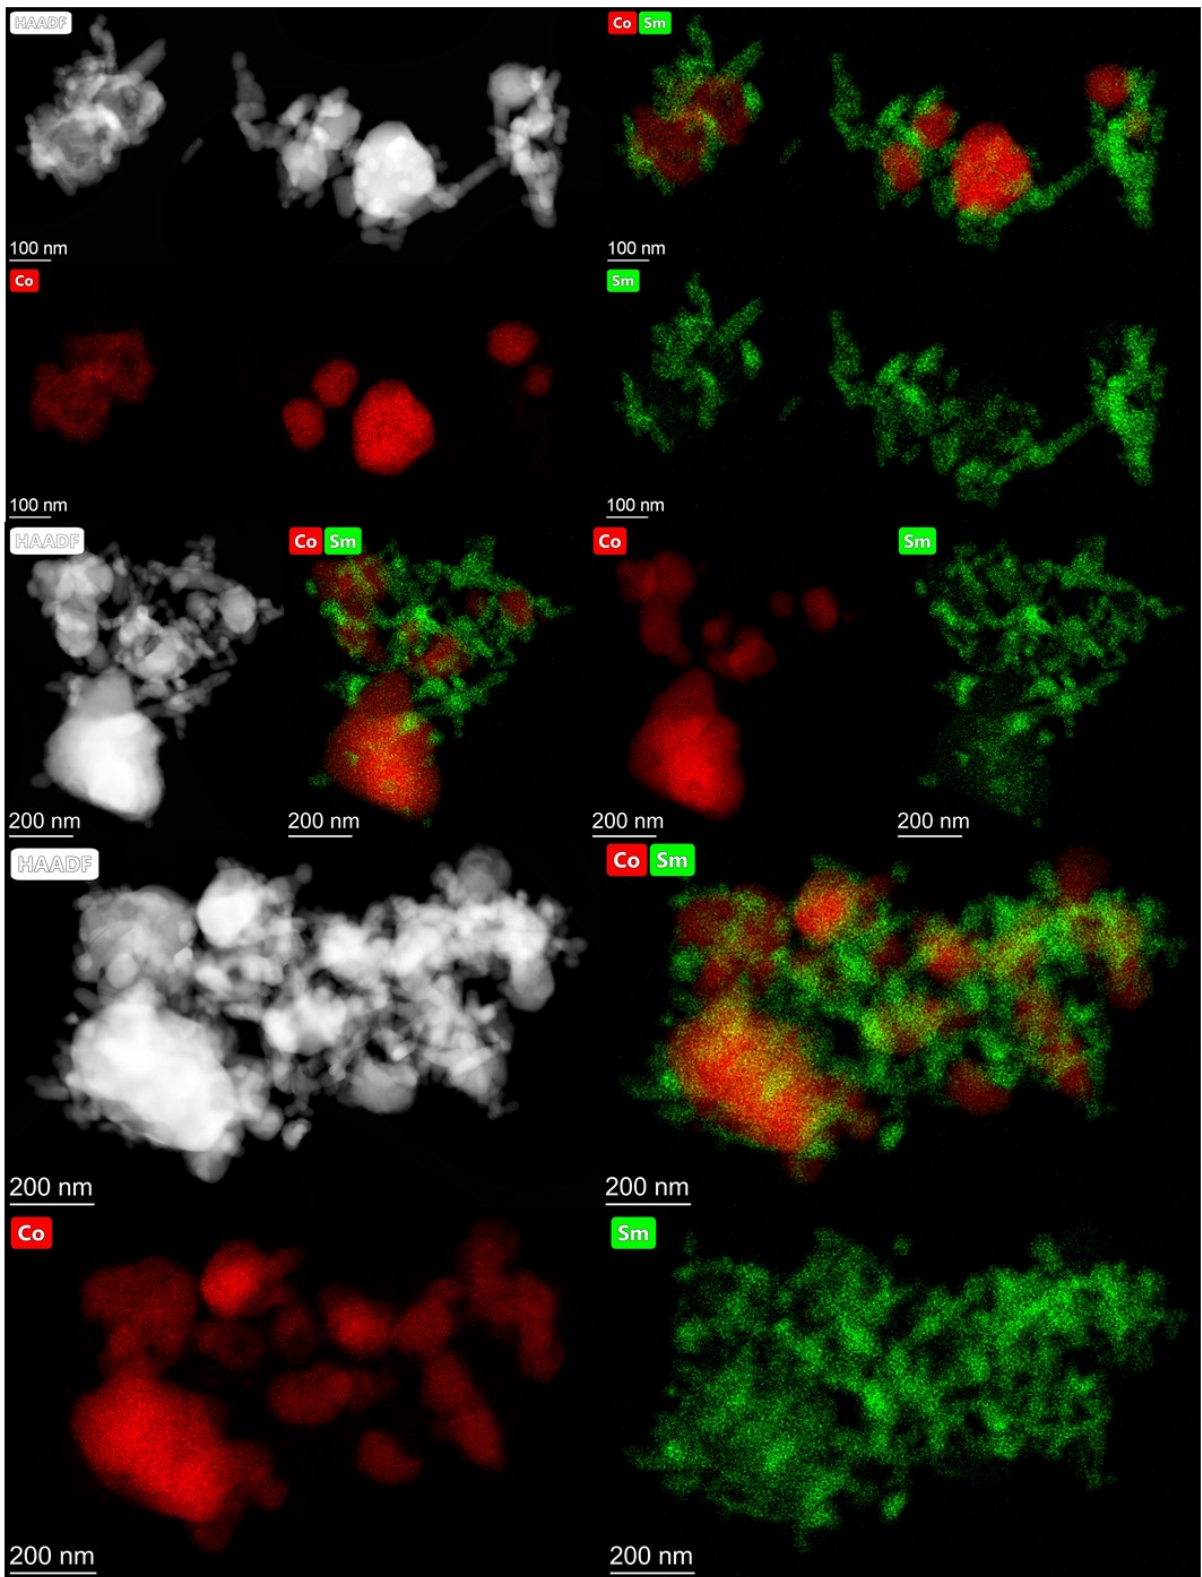

**Figure S10.** HAADF-STEM images and elemental color mapping of SmCo<sub>5</sub>\_HT2.

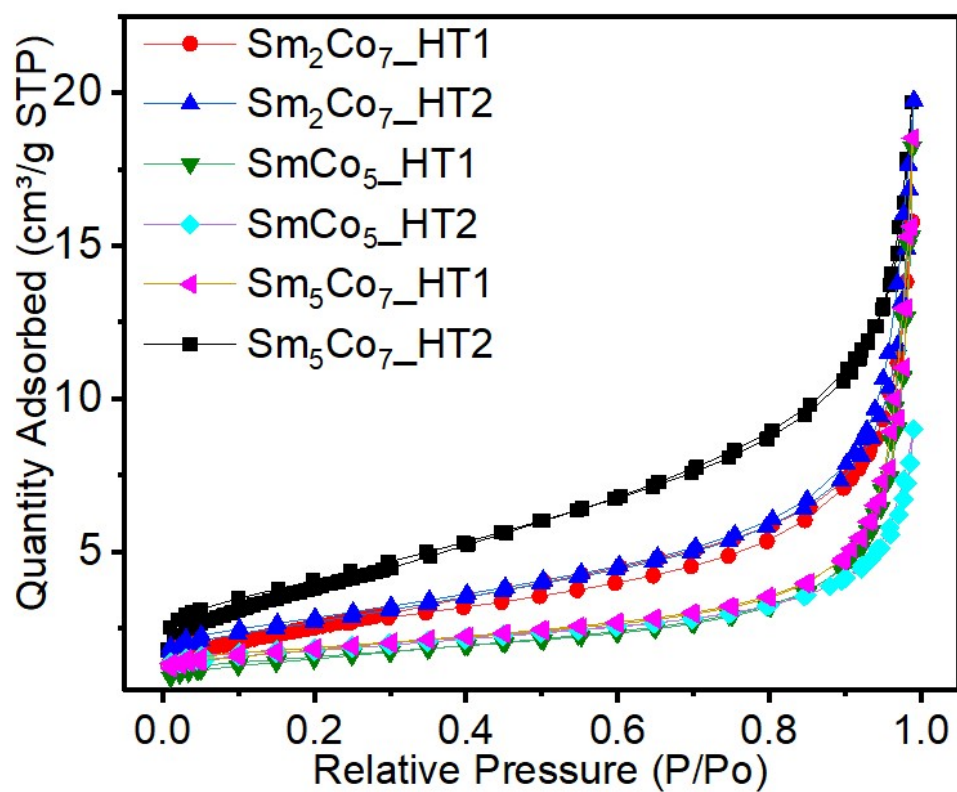

**Figure S11.** N<sub>2</sub> adsorption-desorption isotherms of Sm<sub>x</sub>Co<sub>y</sub> catalysts synthesized from hydrothermal method.

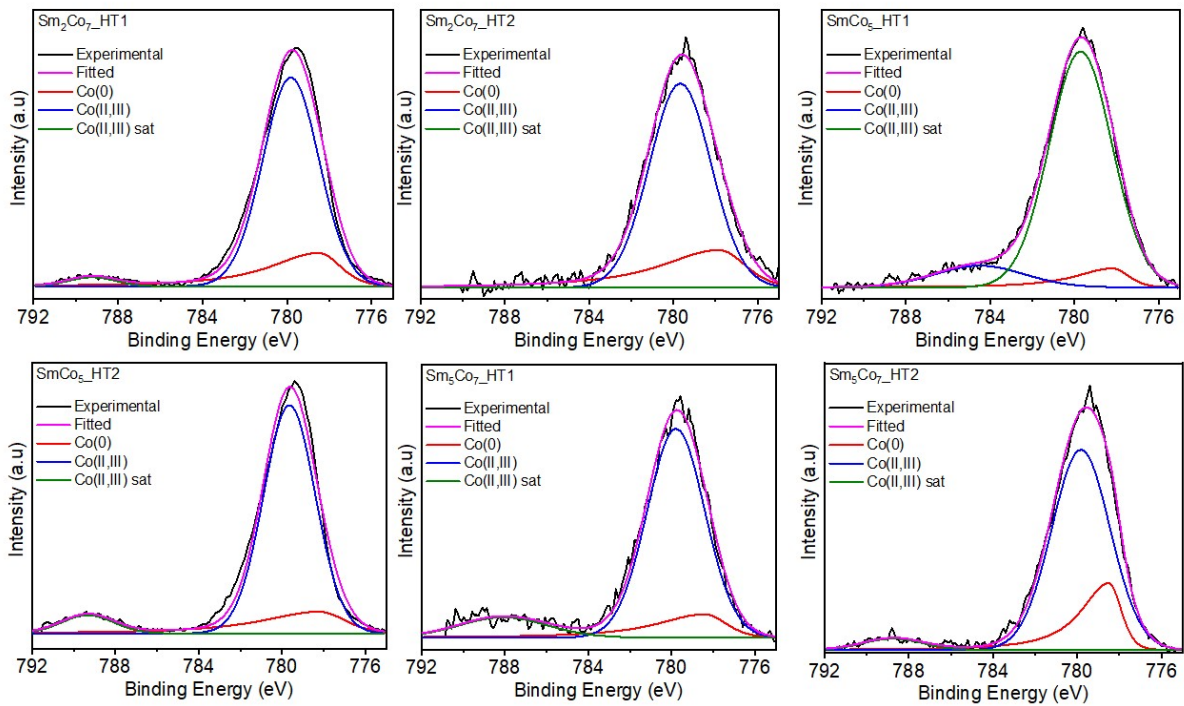

**Figure S12.** XPS of all the Co/Sm<sub>2</sub>O<sub>3</sub> catalysts synthesized by hydrothermal method.

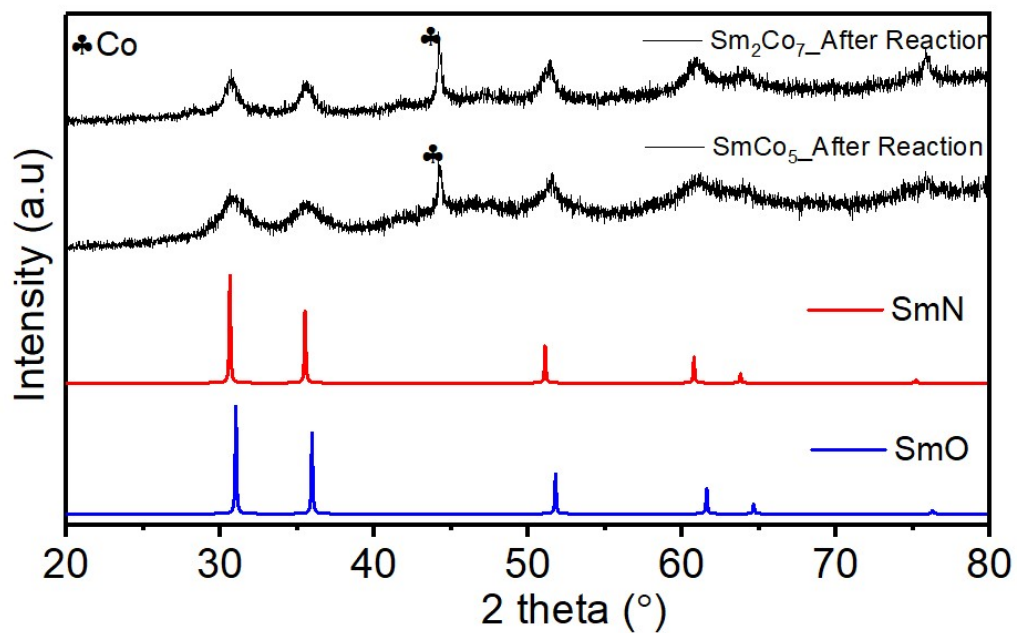

**Figure S13.** Comparison of XRD patterns of Sm<sub>2</sub>Co<sub>7</sub> and SmCo<sub>5</sub> after reaction with simulated SmO and SmN.

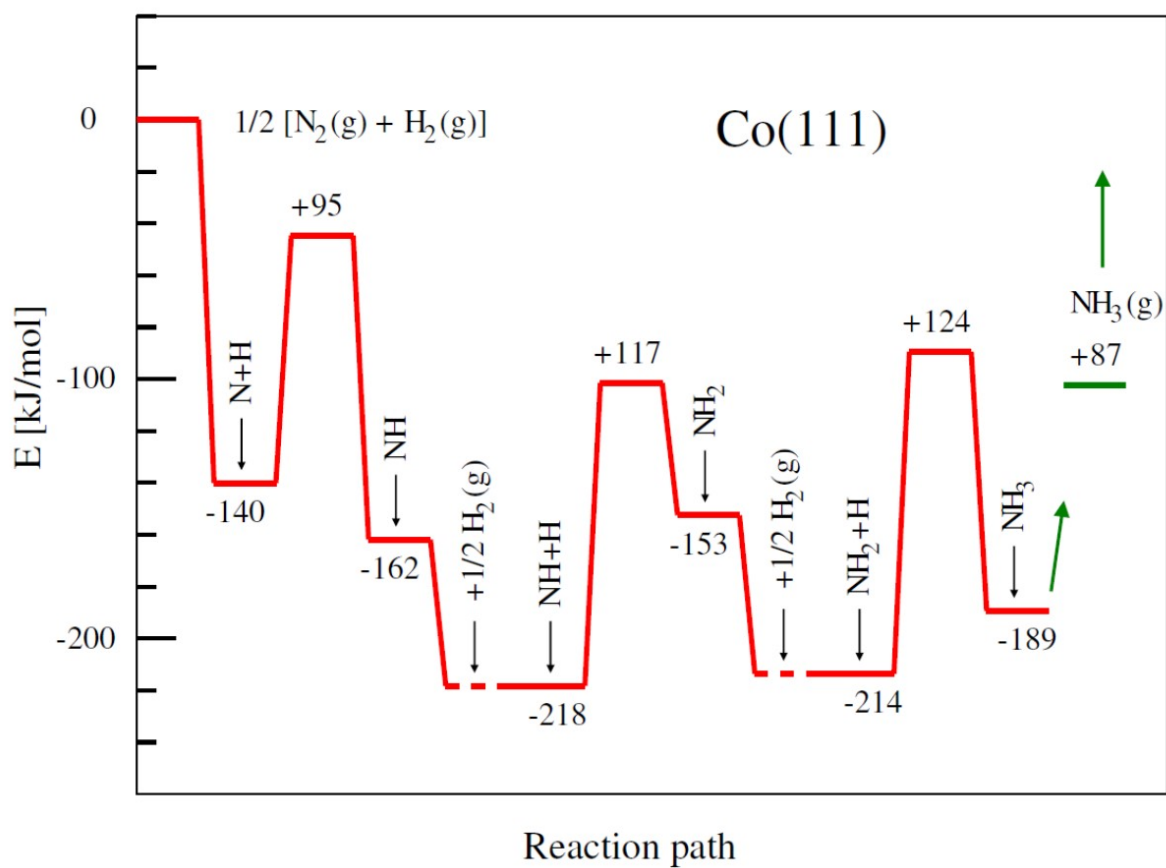

**Figure S14.** Energy profile of hydrogenation steps of  $\text{NH}_3$  synthesis on the  $\text{Co}(111)$  surface.

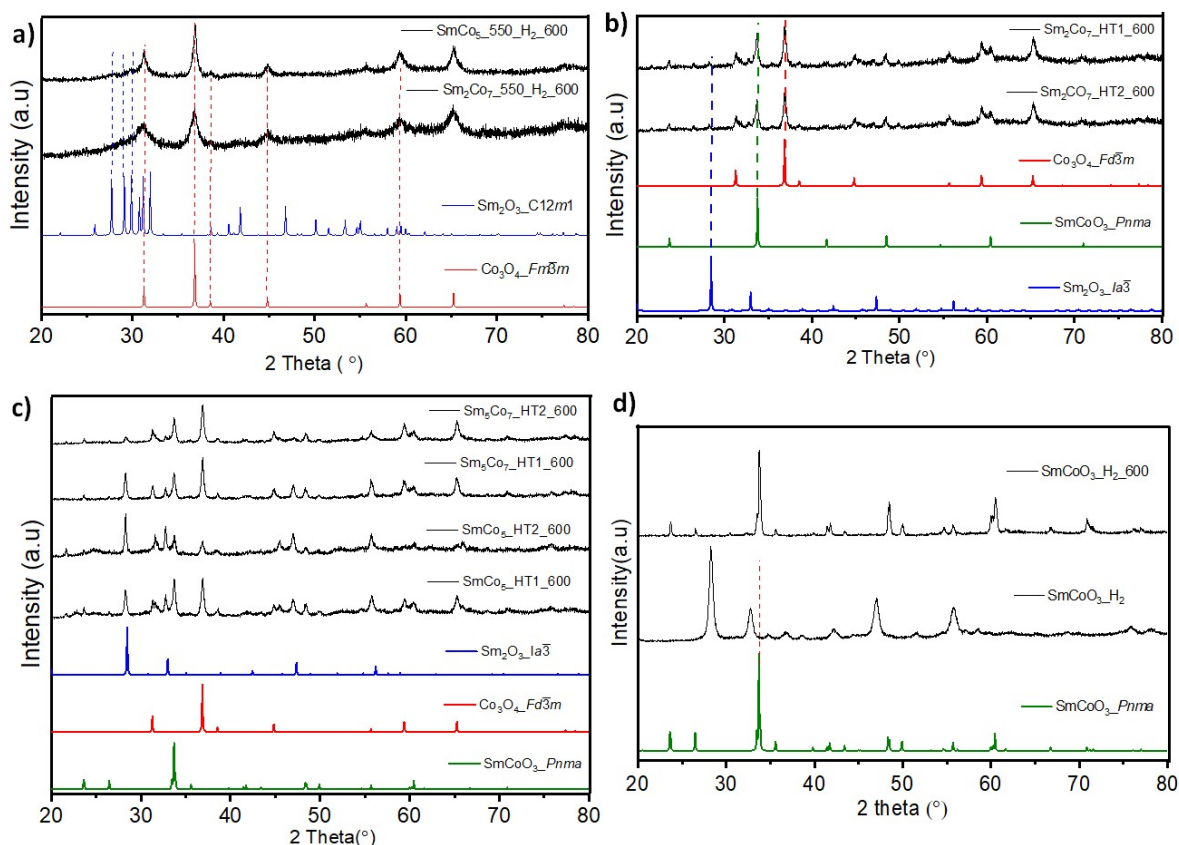

**Figure S15.** XRD patterns of all the Co/Sm<sub>2</sub>O<sub>3</sub> after oxidation at 600 °C a) IMC derived, b&c) hydrothermally synthesized and d) Perovskite derived. In case of all the HT catalysts a small amount of SmCoO<sub>3</sub> is formed along with Co<sub>3</sub>O<sub>4</sub>/Sm<sub>2</sub>O<sub>3</sub>, but for IMC derived catalysts only Co<sub>3</sub>O<sub>4</sub>/Sm<sub>2</sub>O<sub>3</sub> phase is observed instead. For perovskite derived Co/Sm<sub>2</sub>O<sub>3</sub> catalyst the perovskite structure is completely restored.



**Table S1.** Crystallite size of Sm<sub>x</sub>Co<sub>y</sub> catalysts calculated using the Scherrer equation.

| Entry | Catalysts                                           | Crystallite Size(nm) |                                |                                |    |
|-------|-----------------------------------------------------|----------------------|--------------------------------|--------------------------------|----|
|       |                                                     | Intermetallic        | Sm <sub>2</sub> O <sub>3</sub> | Co <sub>3</sub> O <sub>4</sub> | Co |
| 1     | Sm <sub>2</sub> Co <sub>7</sub>                     | 34                   | --                             | --                             | -- |
| 2     | Sm <sub>2</sub> Co <sub>7</sub> _550                | --                   | 5*                             | 11                             | -- |
| 3     | Sm <sub>2</sub> Co <sub>7</sub> _550_H <sub>2</sub> | --                   | 10*                            | --                             | 19 |
| 4     | SmCo <sub>5</sub>                                   | 29                   | --                             | --                             | -- |
| 5     | SmCo <sub>5</sub> _550                              | --                   | 11*                            | 13                             | -- |
| 6     | SmCo <sub>5</sub> _550_H <sub>2</sub>               | --                   | 15*                            | --                             | 23 |
| 7     | Sm <sub>2</sub> Co <sub>7</sub> _550_HT1            | --                   | 26                             | --                             | 25 |
| 8     | Sm <sub>2</sub> Co <sub>7</sub> _550_HT2            | --                   | 17                             | --                             | 23 |
| 9     | SmCo <sub>5</sub> _550_HT1                          | --                   | 22                             | --                             | 19 |
| 10    | SmCo <sub>5</sub> _550_HT2                          | --                   | 24                             | --                             | 30 |
| 11    | Sm <sub>5</sub> Co <sub>7</sub> _550_HT1            | --                   | 27                             | --                             | 25 |
| 12    | Sm <sub>5</sub> Co <sub>7</sub> _550_HT2            | --                   | 23                             | --                             | 12 |
| 13    | SmCoO <sub>3</sub> _550                             | --                   | 19                             | --                             | -- |

\*determined by high energy synchrotron XRD.

| Catalysts                                | T <sub>a</sub> | T <sub>B</sub> | T <sub>γ</sub> |
|------------------------------------------|----------------|----------------|----------------|
| Sm <sub>2</sub> Co <sub>7</sub> _550     | 361            | 417            | 471            |
| SmCo <sub>5</sub> _550                   | 346            | 394            | 446            |
| Sm <sub>2</sub> Co <sub>7</sub> _550_HT1 | 318            | 365            | 418            |
| Sm <sub>2</sub> Co <sub>7</sub> _550_HT2 | 328            | 401            | 472            |
| SmCo <sub>5</sub> _550_HT1               | 319            | 366            | 401            |
| SmCo <sub>5</sub> _550_HT2               | 320            | 358            | 399            |
| Sm <sub>5</sub> Co <sub>7</sub> _550_HT1 | 340            | 432            | 502            |
| Sm <sub>5</sub> Co <sub>7</sub> _550_HT2 | 355            | 437            | 496            |

**Table S2.** Fitted components of TPR-H<sub>2</sub> spectra of Sm<sub>x</sub>Co<sub>y</sub> catalysts.

**Table S3.** Comparison of catalytic activity of the Co/Sm<sub>2</sub>O<sub>3</sub> catalyst with other reported cobalt-based catalysts

| Entry | Catalyst                                            | Surface Area [m <sup>2</sup> /g] | Temperature [°C] | Pressure [MPa] | NH <sub>3</sub> yield [μmole/g/h] | Ea [kJ/mole] | Ref          |
|-------|-----------------------------------------------------|----------------------------------|------------------|----------------|-----------------------------------|--------------|--------------|
| 1     | Co-LiH                                              | 42                               | 300              | 1              | 4800                              | 52.1         | [24]         |
| 2     | Co-BaH <sub>2</sub> /CNT                            | 53                               | 300              | 1              | 4800                              | 58.0         | [25]         |
| 3     | Co/BaTiO <sub>2.35</sub> H <sub>0.65</sub>          | 05                               | 400              | 5              | 550                               | 69.0         | [50]         |
| 4     | Co/C12A7:e <sup>-</sup>                             | 01                               | 340              | 0.1            | 912                               | 49.5         | [26]         |
| 5     | LaCoSi                                              | 01                               | 400              | 0.1            | 1250                              | 42.0         | [51]         |
| 6     | Co <sub>3</sub> Mo <sub>3</sub> N                   | 18                               | 400              | 0.1            | 489                               | 59.0         | [51]         |
| 7     | Co/CeO <sub>2</sub> -dopamine                       | 61                               | 425              | 1              | 19200                             | 72.0         | [22]         |
| 8     | Co/CeO <sub>2</sub>                                 | 60                               | 425              | 1              | 3810                              | 107          | [22]         |
| 9     | LaCoO <sub>3</sub>                                  | 05                               | 450              | 1              | 4600                              | --           | [33]         |
| 10    | Sm <sub>2</sub> Co <sub>7</sub> _550_H <sub>2</sub> | 13                               | 350              | 0.4            | 250                               | 77.0         | Present work |
|       |                                                     |                                  | 400              | 0.4            | 500                               |              |              |
|       |                                                     |                                  | 450              | 0.4            | 1600                              |              |              |
|       |                                                     |                                  | 500              | 0.4            | 3850                              |              |              |
| 11    | Co/SmO                                              | 01                               | 350              | 0.4            | 150                               | 52.0         | Present work |
|       |                                                     |                                  | 400              | 0.4            | 300                               |              |              |
|       |                                                     |                                  | 450              | 0.4            | 550                               |              |              |
|       |                                                     |                                  | 500              | 0.4            | 1000                              |              |              |
